# Supplementary material for: Hypervirulent Klebsiella pneumoniae Strains Modulate Human Dendritic Cell Functions and Affect TH1/TH17 Response
Source: MDPI journal article supplement (doi:10.3390/microorganisms10020384), 2022-02-07
Supplement: s1 [file s1]

| <b>IL-23A</b> | US          | LPS     | CIP 52.145  | HMV-1   | HMV-2   | RM1628  | KPOC62      |
|---------------|-------------|---------|-------------|---------|---------|---------|-------------|
| LPS           | 1           | -       | -           | -       | -       | -       | -           |
| CIP 52.145    | 1           | -       | -           | -       | -       | -       | -           |
| HMV-1         | 1           | 1       | -           | -       | -       | -       | -           |
| HMV-2         | 1           | 1       | 1           | -       | -       | -       | -           |
| RM1628        | 1           | 1       | 1           | 1       | -       | -       | -           |
| KP04C62       | 0.000000013 | 1.3E-08 | 0.000000013 | 1.9E-08 | 1.9E-08 | 2.1E-08 | -           |
| KPC157        | 1           | 1       | 1           | 1       | 1       | 1       | 0.000000061 |

| <b>IL-12A</b> | US      | LPS     | CIP 52.145 | HMV-1   | HMV-2   | RM1628  | KPOC62  |
|---------------|---------|---------|------------|---------|---------|---------|---------|
| LPS           | 1       | -       | -          | -       | -       | -       | -       |
| CIP 52.145    | 1       | 1       | -          | -       | -       | -       | -       |
| HMV-1         | 0.54774 | 0.54774 | 0.9216     | -       | -       | -       | -       |
| HMV-2         | 1       | 1       | 1          | 1       | -       | -       | -       |
| RM1628        | 1       | 1       | 1          | 1       | 1       | -       | -       |
| KP04C62       | 2.7E-06 | 2.7E-06 | 5E-06      | 0.00011 | 7.1E-06 | 7.1E-06 | -       |
| KPC157        | 0.17302 | 0.17302 | 0.3571     | 1       | 0.56097 | 0.56097 | 0.00033 |

| <b>IL-1β</b> | US          | LPS     | CIP 52.145  | HMV-1   | HMV-2      | RM1628     | KPOC62  |
|--------------|-------------|---------|-------------|---------|------------|------------|---------|
| LPS          | 1           | -       | -           | -       | -          | -          | -       |
| CIP 52.145   | 1           | 1       | -           | -       | -          | -          | -       |
| HMV-1        | 0.00053     | 0.00079 | 0.00232     | -       | -          | -          | -       |
| HMV-2        | 0.01566     | 0.02233 | 0.06694     | 0.55758 | -          | -          | -       |
| RM1628       | 0.06694     | 0.0978  | 0.22882     | 0.14017 | 1          | -          | -       |
| KP04C62      | 0.000000025 | 3.3E-07 | 0.000000072 | 0.00232 | 0.00009921 | 0.00002442 | -       |
| KPC157       | 0.00009405  | 0.00013 | 0.00037     | 1       | 0.11029    | 0.00261    | 0.01645 |

| <b>TNF-1</b> | US      | LPS     | CIP 52.145 | HMV-1    | HMV-2    | RM1628   | KPOC62  |
|--------------|---------|---------|------------|----------|----------|----------|---------|
| LPS          | 1       | -       | -          | -        | -        | -        | -       |
| CIP 52.145   | 1       | 1       | -          | -        | -        | -        | -       |
| HMV-1        | 0.00188 | 0.00188 | 0.0019     | -        | -        | -        | -       |
| HMV-2        | 0.50699 | 0.50699 | 0.507      | 0.10526  | -        | -        | -       |
| RM1628       | 0.52163 | 0.52163 | 0.5216     | 0.07485  | 1        | -        | -       |
| KP04C62      | 2E-07   | 2E-07   | 2E-07      | 0.00046  | 3.12E-06 | 2.42E-06 | -       |
| KPC157       | 3.4E-09 | 3.4E-09 | 3E-09      | 1.15E-06 | 2.99E-08 | 2.45E-08 | 0.02609 |

| <b>IL-6</b> | US      | LPS     | CIP 52.145 | HMV-1   | HMV-2   | RM1628   | KPOC62   |
|-------------|---------|---------|------------|---------|---------|----------|----------|
| LPS         | 1       | -       | -          | -       | -       | -        | -        |
| CIP 52.145  | 1       | 1       | -          | -       | -       | -        | -        |
| HMV-1       | 1       | 1       | 1          | -       | -       | -        | -        |
| HMV-2       | 1       | 1       | 1          | 1       | -       | -        | -        |
| RM1628      | 1       | 1       | 1          | 1       | 1       | -        | -        |
| KP04C62     | 1.9E-09 | 1.9E-09 | 2.1E-09    | 3.5E-09 | 5.3E-09 | 1.31E-09 | -        |
| KPC157      | 1       | 1       | 1          | 1       | 1       | 1        | 1.31E-09 |

| <b>IL-10</b> | US    | LPS     | CIP 52.145 | HMV-1 | HMV-2 | RM1628 | KPOC62 |
|--------------|-------|---------|------------|-------|-------|--------|--------|
| LPS          | 1     | -       | -          | -     | -     | -      | -      |
| CIP 52.145   | 4E-06 | 6.9E-07 | -          | -     | -     | -      | -      |
| HMV-1        | 1     | 1       | 5E-07      | -     | -     | -      | -      |
| HMV-2        | 1     | 1       | 5E-07      | 1     | -     | -      | -      |
| RM1628       | 1     | 1       | 5E-07      | 1     | 1     | -      | -      |
| KP04C62      | 1     | 1       | 1E-07      | 1     | 1     | 1      | -      |
| KPC157       | 1     | 1       | 5E-07      | 1     | 1     | 1      | 1      |

| <b>IFN-1</b> | US      | CIP 52.145 | HMV-1   | RM1628  | KPOC62  |
|--------------|---------|------------|---------|---------|---------|
| CIP 52.145   | 0.9     | -          | -       | -       | -       |
| HMV-2        | 1       | 1          | -       | -       | -       |
| RM1628       | 0.38    | 1          | 1       | -       | -       |
| KP04C62      | 0.19    | 1          | 0.9     | 1       | -       |
| KPC157       | 1.7E-09 | 4E-09      | 2.9E-09 | 5.3E-09 | 6.4E-09 |

| <b>IL-17</b> | US      | CIP 52.145 | HMV-1  | RM1628  | KPOC62  |
|--------------|---------|------------|--------|---------|---------|
| CIP 52.145   | 1       | -          | -      | -       | -       |
| HMV-2        | 1       | 1          | -      | -       | -       |
| RM1628       | 1       | 1          | 1      | -       | -       |
| KP04C62      | 0.00124 | 0.00021    | 0.0006 | 0.00053 | -       |
| KPC157       | 1       | 0.13777    | 0.4779 | 0.44699 | 0.01492 |

**Supplementary Table S1.** In tables are reported ANOVA test with Holm p value adjustment for each *Klebsiella pneumoniae* stimuli.

| Cytokine production (pg/mL) |          |       |
|-----------------------------|----------|-------|
|                             | IL-12p70 | IL-1β |
| US                          | 14       | 6     |
| CIP 52.145                  | 73       | 355   |
| HMV-1                       | 185,8    | 435   |
| HMV-2                       | 217,75   | 622   |
| RM1628                      | 238,5    | 266,5 |
| KP04C62                     | 1434     | 185,5 |
| KPC157                      | 746      | 672   |

**Supplementary Table S2.** Cytokine's production of DCs. Equal amounts from three different cultures were pooled. US: unstimulated cultures.

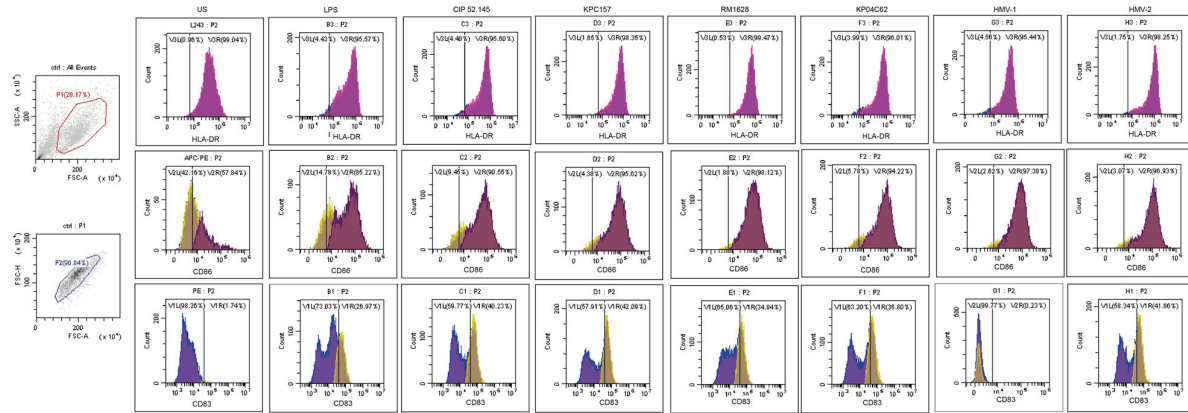

**Supplementary Figure S1.** DCs were stained with a mixture of anti-CD83-FITC, anti-CD86-APC and anti-HLRA-DR-PE antibodies. Ten thousand events for each sample were acquired. US: unstimulated.

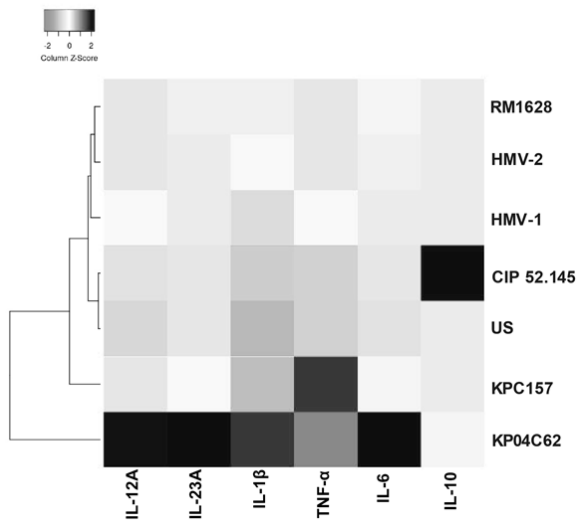

**Supplementary Figure S2.** Cytokine expression by DCs cultured in presence of live *K. pneumoniae* strains by heat-map analysis.
